# Supplementary material for: Fetal Myocardial Expression of GLUT1: Roles of BPA Exposure and Cord Blood Exosomes in a Rat Model
Source: MDPI journal article supplement (doi:10.3390/cells11203195), 2022-10-11
Supplement: s1 [file s1]

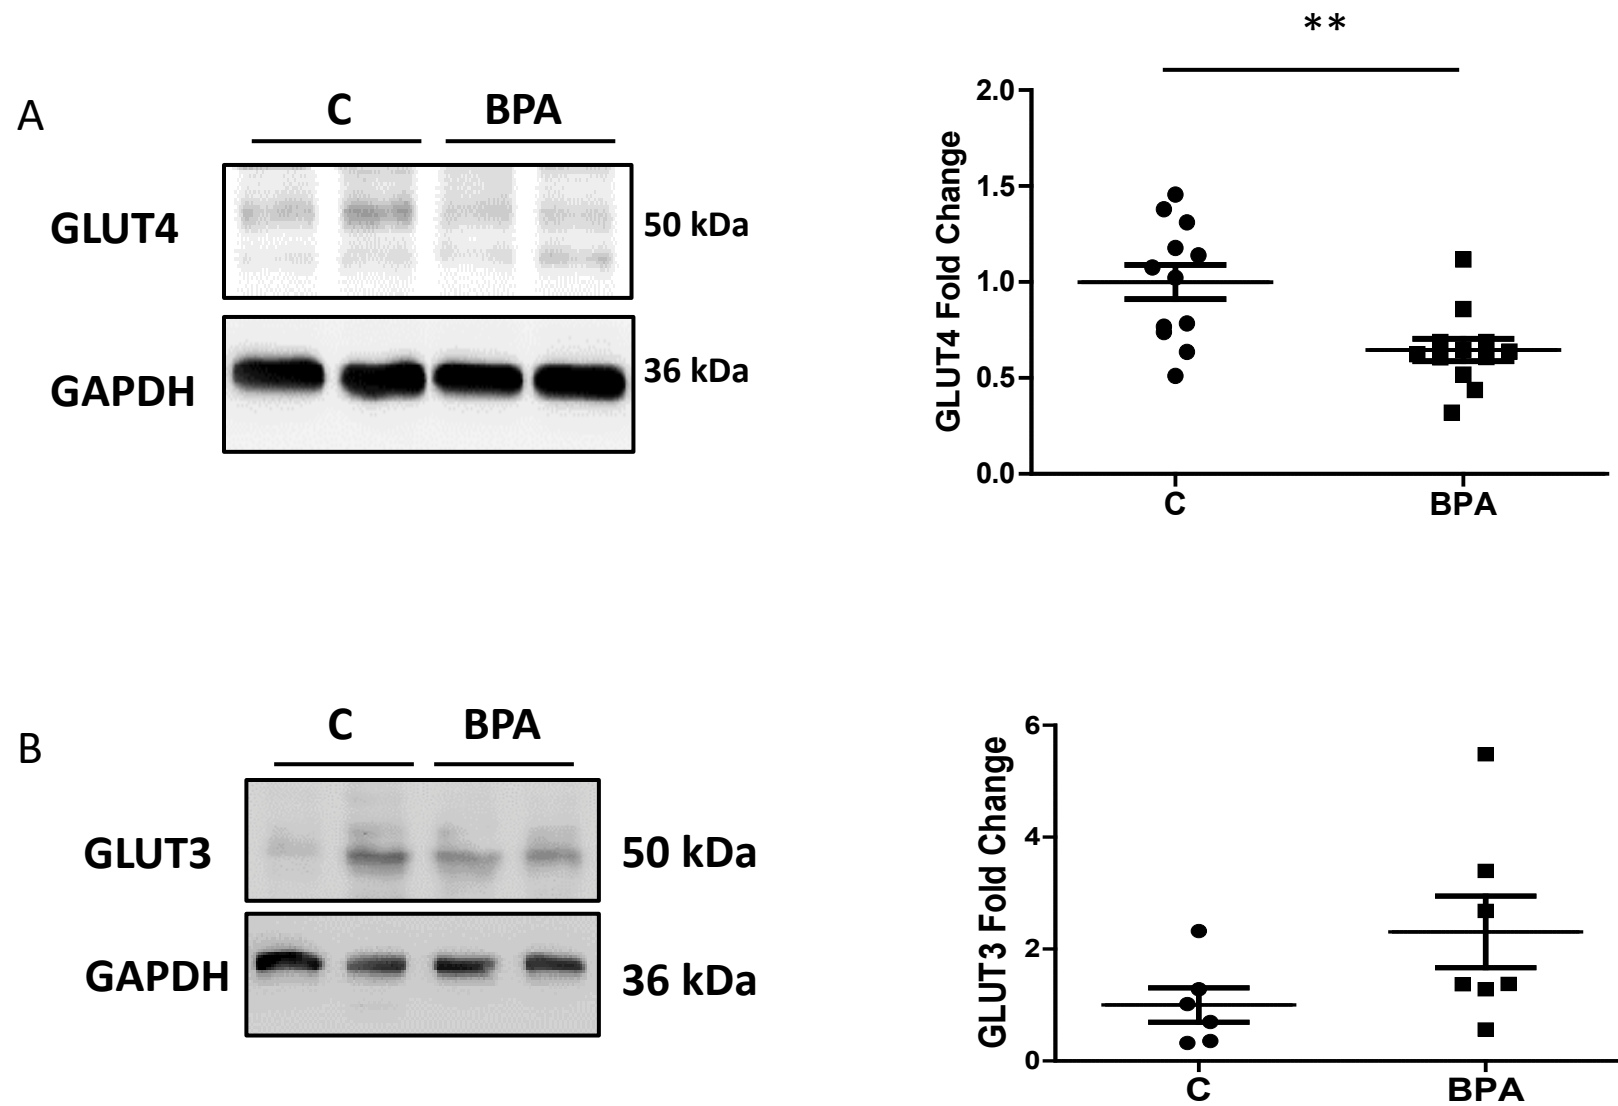

**Figure S1.** Representative WB and corresponding densitometry for GLUT4 (A) and GLUT3 (B) in lysates of fetal hearts obtained from BPA feed and control rats.

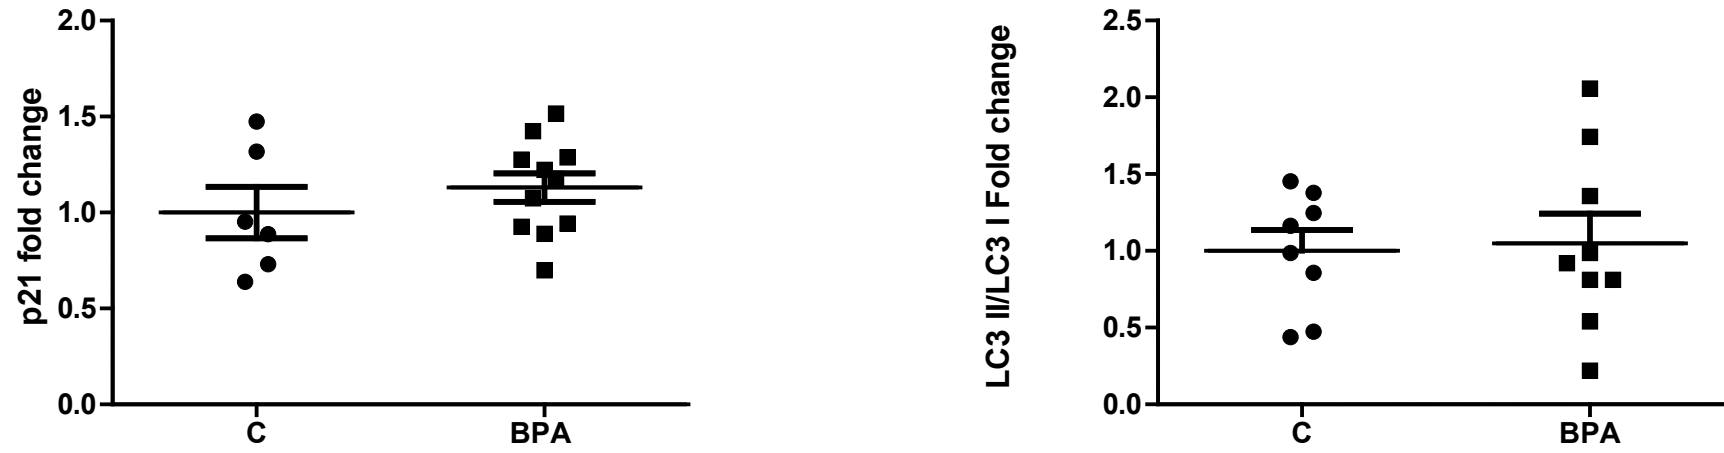

**Figure S2.** Densitometry for p21 and LC3 in lysates of fetal hearts obtained from BPA feed and control rats.

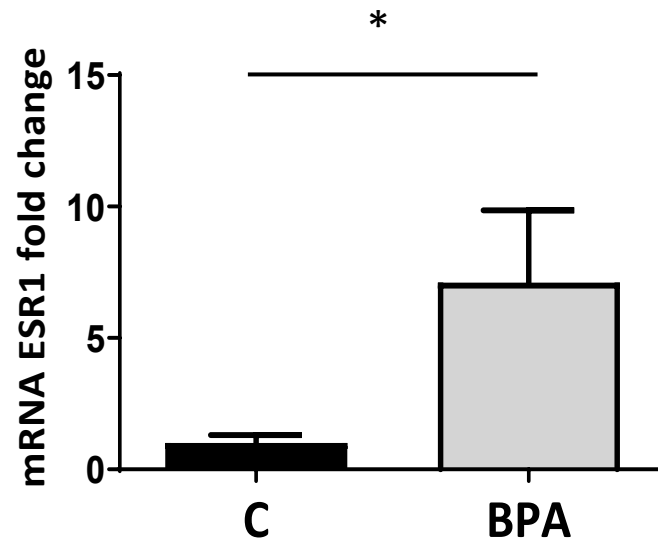

**Figure S3.** Estrogen receptor alpha (ESR1) mRNA expression in fetal hearts obtained from BPA feed and control rats.

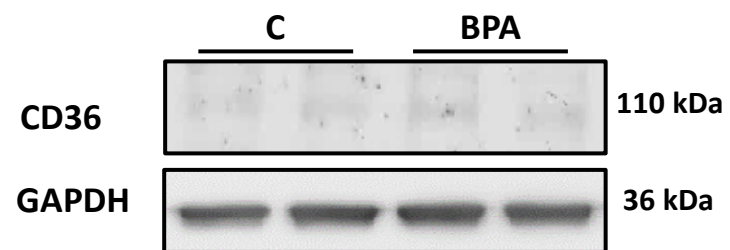

**Figure S4.** Representative WB for CD36 in lysates of fetal heart organotypic culture treated with BPA or control.

A

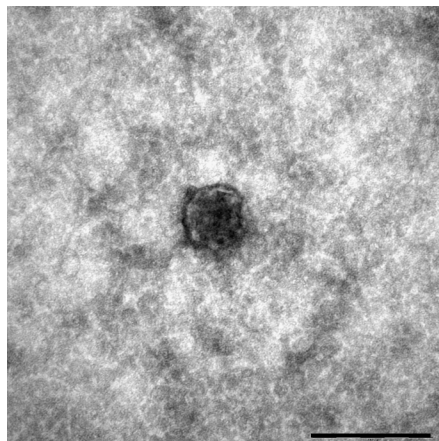

B

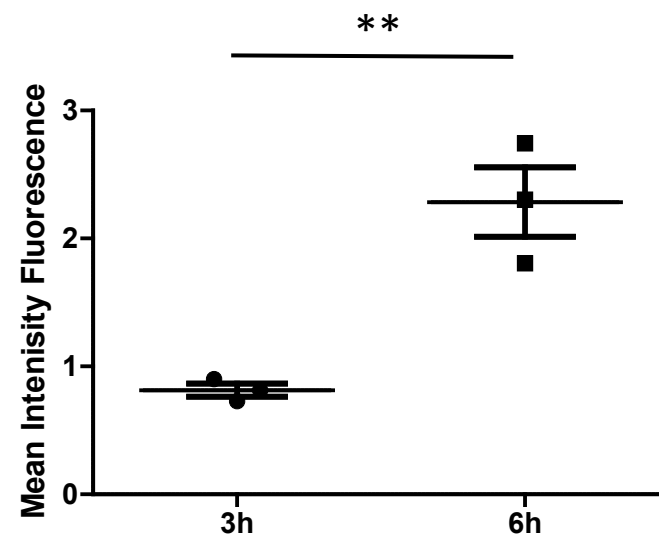

C

Exo

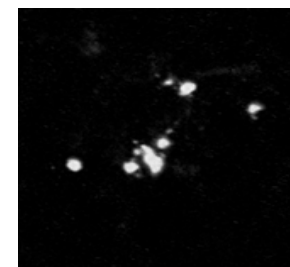

Rab7

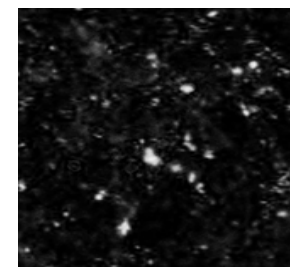

Merge

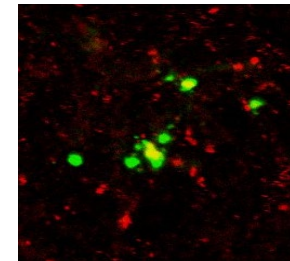

**Figure S5.** TEM analysis (A) and uptake (B and C) of cord blood exosomes.
